# Supplementary material
Source: publisher site journal article supplement (https://www.dovepress.com/article/224277)
Supplement: Supplementary file 1 [file get_supplementary_file.php]

**Supplementary Materials**

**Supplementary Data: Canadian medication cost savings associated with combinatorial pharmacogenomic guidance for psychiatric medications**

**Supplementary Table 1.** Prescription drug refill matching by drug name, according to United States medication therapeutic chapters.

| United States therapeutic chapter | Chapter description | Number of prescription refills matched | Total number of prescription refills | Proportion of prescription refills matched |
| --- | --- | --- | --- | --- |
| 1 | Anti-Infectives | 8,757 | 8,923 | 98.1% |
| 2 | Anti-Neoplastic | 689 | 689 | 100.0% |
| 3 | Central Nervous System | 69,946 | 86,923 | 80.5% |
| 4 | Cardiovascular Disease | 21,984 | 23,433 | 93.8% |
| 5 | Dermatology | 3,017 | 3,663 | 82.4% |
| 6 | ENT | 44 | 787 | 5.6% |
| 7 | Diabetes | 10,012 | 12,131 | 82.5% |
| 8 | Gastroenterology | 6,128 | 8,606 | 71.2% |
| 9 | Immunology | 0 | 157 | 0.0% |
| 10 | Rheumatology | 879 | 1,191 | 73.8% |
| 11 | Obstetrician-Gynecology | 3,244 | 4,023 | 80.6% |
| 12 | Ophthalmology | 1,206 | 1,495 | 80.7% |
| 13 | Allergy | 2,155 | 5,596 | 38.5% |
| 14 | Urologicals | 2,780 | 3,092 | 89.9% |
| 15 | Vitamins | 2,534 | 3,026 | 83.7% |
| 16 | Diagnostics | 1,021 | 1,659 | 61.5% |
| - | Total | 134,396 | 165,394 | 81.3% |

**Supplementary Table 2.** Congruent and incongruent cohort matching statistics before and after matching on age, gender, drug class, and diagnosis.

|  | **Before Matching** | | | **After Matching** | | |
| --- | --- | --- | --- | --- | --- | --- |
|  | **Congruent (N=1301)** | **Incongruent (N=361)** | **p-value** | **Congruent (N=989)** | **Incongruent (N=352)** | **p-value** |
| Age, mean (+SD) |  |  |  |  |  |  |
|  | 52.3(16.97) | 55.35(16.63) | 0.002 | 54.04(16.27) | 54.81(16.34) | 0.446 |
| Sex, n (%) |  |  | 0.684 |  |  | 0.669 |
| F | 904( 69.5) | 247( 68.4) |  | 692( 70.0) | 242( 68.8) |  |
| M | 396( 30.5) | 114( 31.6) |  | 297( 30.0) | 110( 31.3) |  |
| Antipsychotics, n (%) |  |  | 0.385 |  |  | 0.999 |
| No | 949( 72.9) | 255( 70.6) |  | 708( 71.6) | 252( 71.6) |  |
| Yes | 352( 27.1) | 106( 29.4) |  | 281( 28.4) | 100( 28.4) |  |
| SNRIs, n (%) |  |  | <.001 |  |  | 0.01 |
| No | 873( 67.1) | 184( 51.0) |  | 595( 60.2) | 184( 52.3) |  |
| Yes | 428( 32.9) | 177( 49.0) |  | 394( 39.8) | 168( 47.7) |  |
| SSRIs, n (%) |  |  | <.001 |  |  | 0.057 |
| No | 305( 23.4) | 124( 34.3) |  | 273( 27.6) | 116( 33.0) |  |
| Yes | 996( 76.6) | 237( 65.7) |  | 716( 72.4) | 236( 67.0) |  |
| Tricyclic, n (%) |  |  | 0.864 |  |  | 0.893 |
| No | 1,149( 88.3) | 320( 88.6) |  | 882( 89.2) | 313( 88.9) |  |
| Yes | 152( 11.7) | 41( 11.4) |  | 107( 10.8) | 39( 11.1) |  |
| Norepinephrine, n (%) |  |  | <.001 |  |  | 0.036 |
| No | 581( 44.7) | 105( 29.1) |  | 356( 36.0) | 105( 29.8) |  |
| Yes | 720( 55.3) | 256( 70.9) |  | 633( 64.0) | 247( 70.2) |  |
| Anxiety Disorder, n (%) |  |  | 0.115 |  |  | 0.989 |
| No | 639( 71.0) | 182( 76.2) |  | 508( 75.6) | 177( 75.6) |  |
| Yes | 261( 29.0) | 57( 23.8) |  | 164( 24.4) | 57( 24.4) |  |
| Bipolar Disorder, n (%) |  |  | 0.568 |  |  | 0.762 |
| No | 831( 92.3) | 218( 91.2) |  | 616( 91.7) | 213( 91.0) |  |
| Yes | 69( 7.7) | 21( 8.8) |  | 56( 8.3) | 21( 9.0) |  |
| MDD, n (%) |  |  | 0.919 |  |  | 0.847 |
| No | 538( 59.8) | 142( 59.4) |  | 404( 60.1) | 139( 59.4) |  |
| Yes | 362( 40.2) | 97( 40.6) |  | 268( 39.9) | 95( 40.6) |  |

**Supplementary Figure 1.** Flow chart depicting the prescription medication cost translation process. U.S.: United States, MOHLTC: Ministry of Health and Long-Term Care, ODB: Ontario Drug Benefit.

**
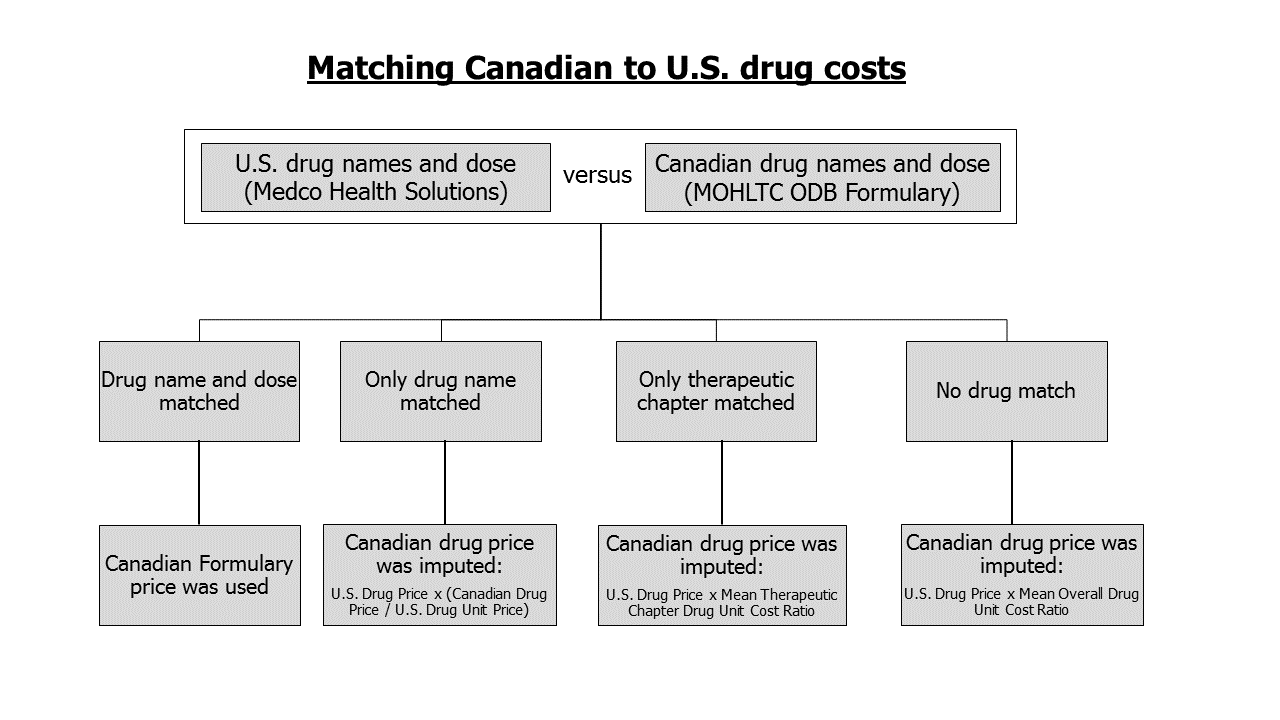
**

**Supplementary Figure 2.** Annual medication costs in each therapeutic drug chapter and stratified by congruence with combinatorial pharmacogenomic test report recommendations. (A) Overall cohort. (B) <65 and ≥65 age groups.

**
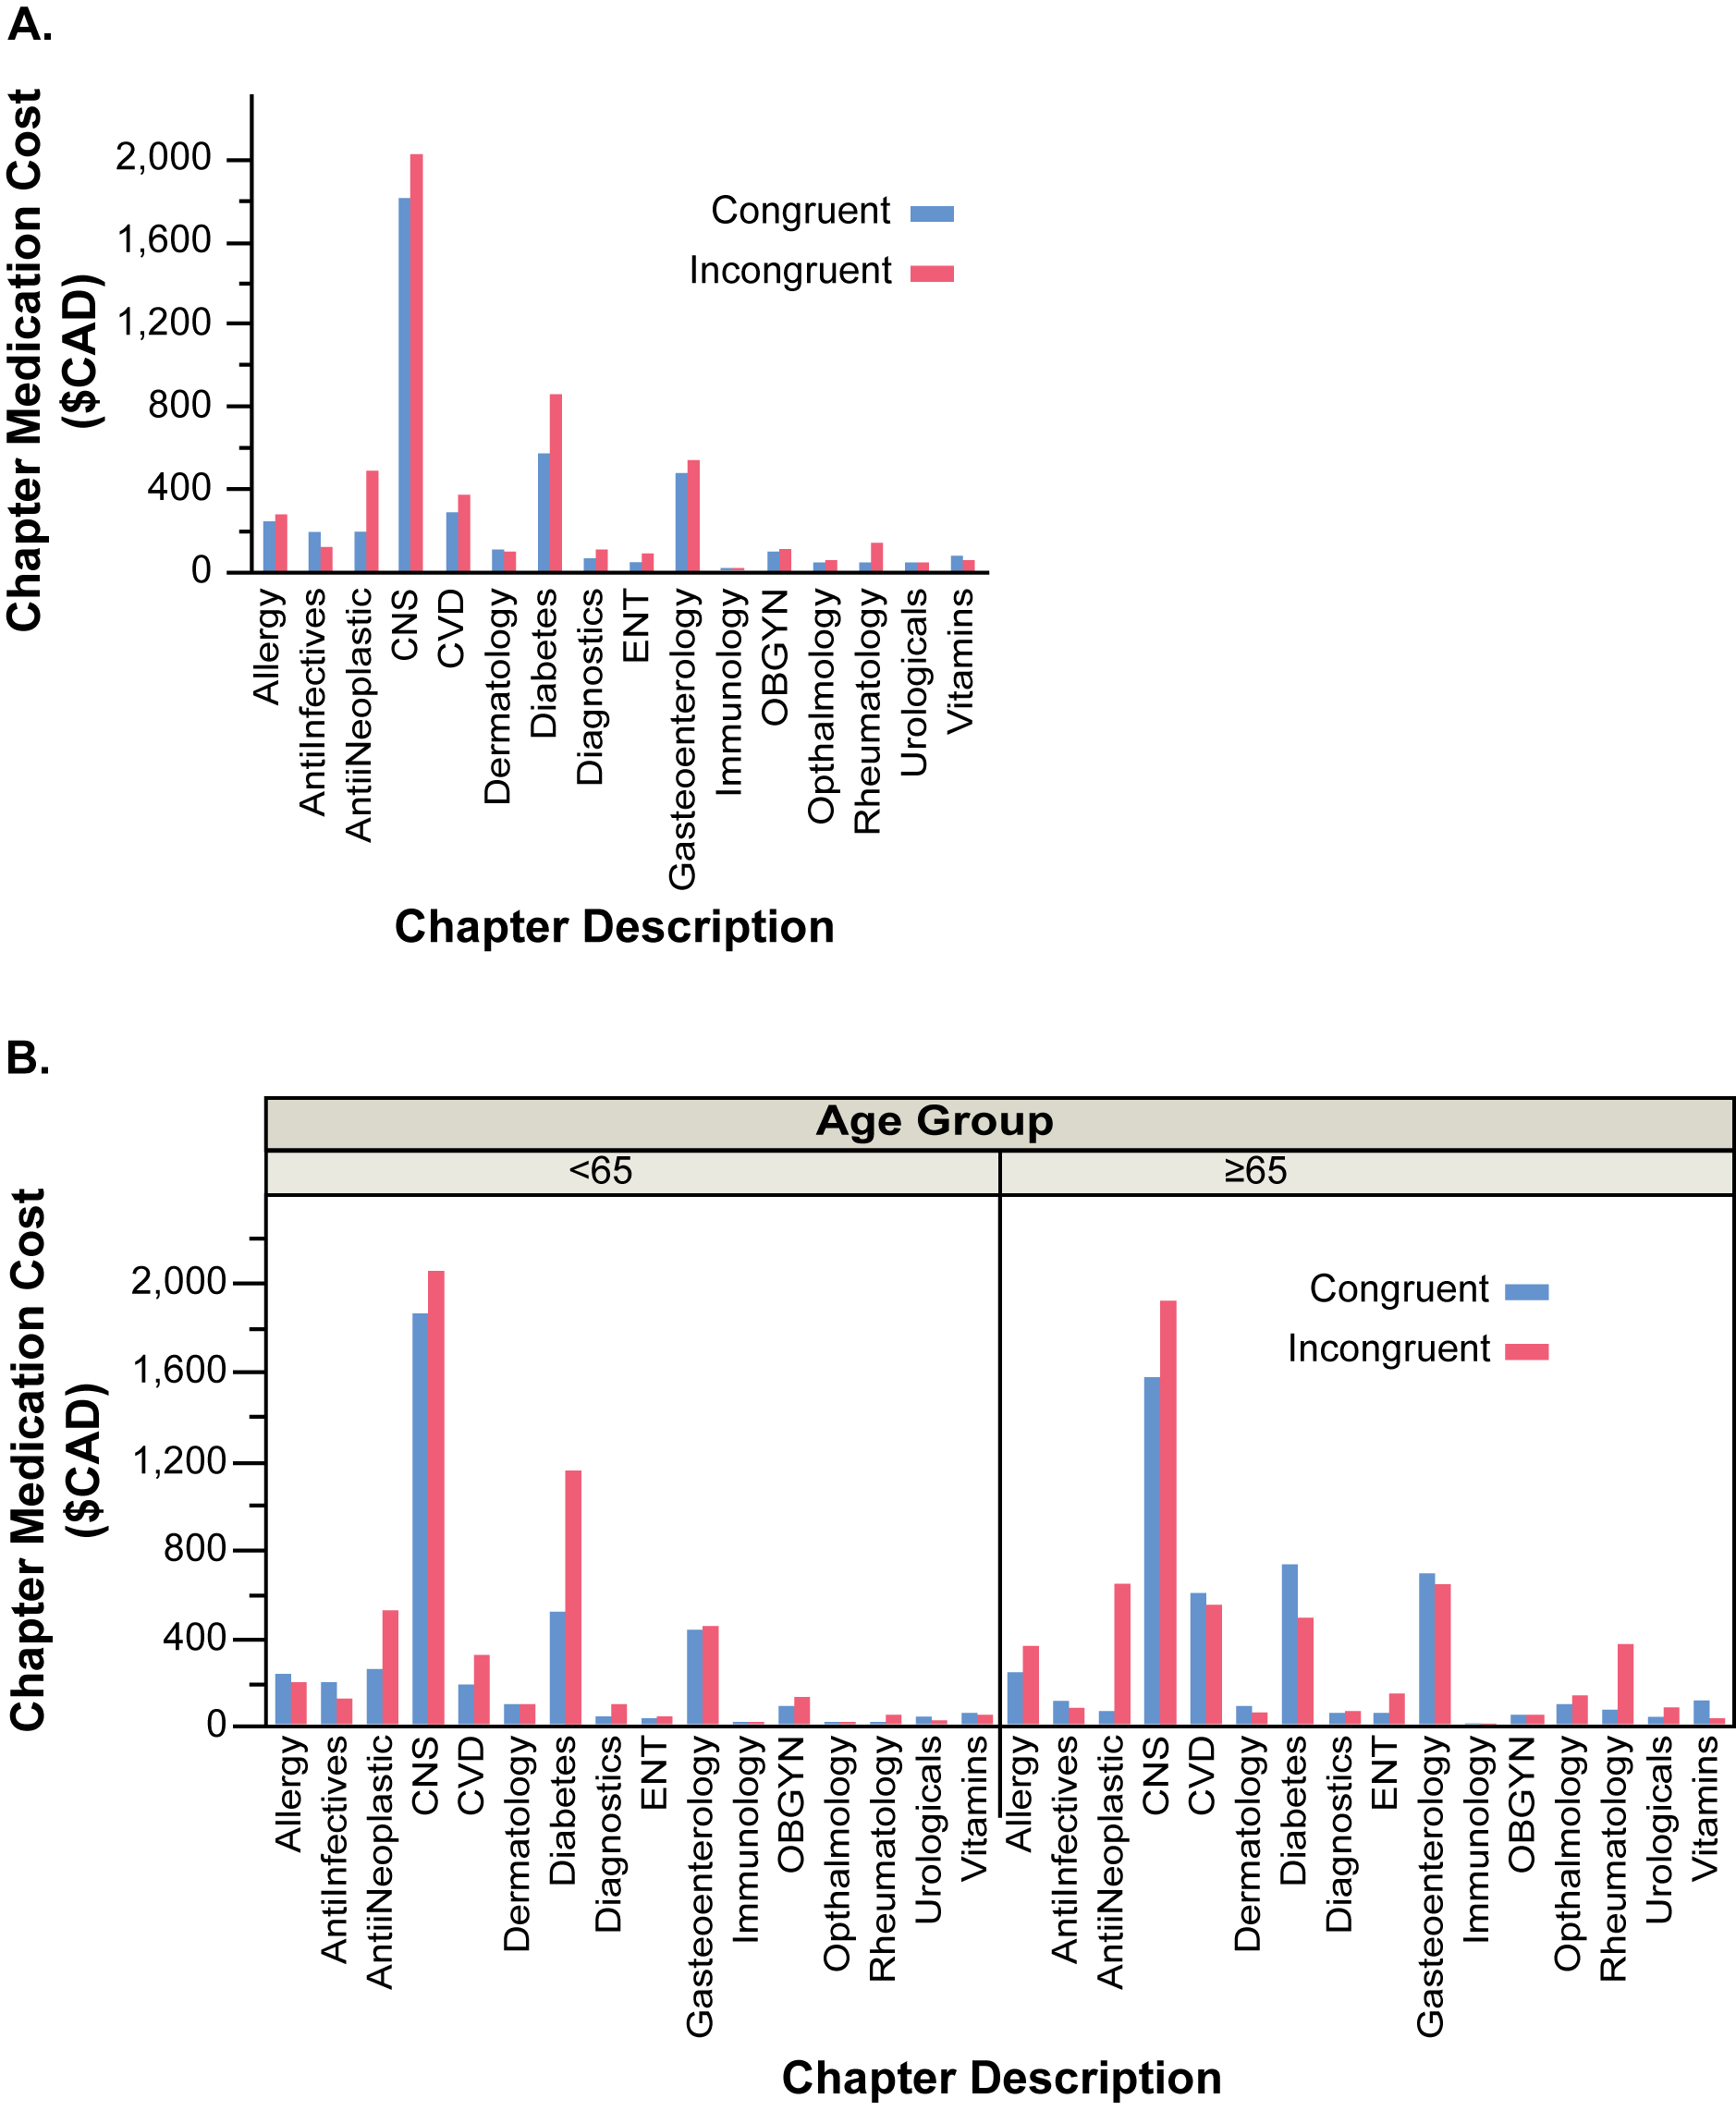
**
